# Supplementary material
Source: PubMed Central journal article supplement (PMC4104888)
Supplement: 1403319111_pnas.201403319SI.pdf [file 1403319111_pnas.201403319SI.pdf]

# Supporting Information

Kelly et al. 10.1073/pnas.1403319111

## SI Materials and Methods

**Sample Collection.** Samples were collected at 22 sites distributed across the 11 major atolls in the Line Island archipelago, 1–4 sites per atoll. Seawater samples of ~100 L were collected at the surface of representative benthos (including within crevices, when present) across ~20 m<sup>2</sup> of reef using a modified bilge pump. Samples were collected directly into low-density polyethylene collapsible bags (19 L; Cole-Parmer) and transported to the research vessel within 2 h. Before sampling, all containers, bilge pumps, and tubing were washed once with 1% bleach and 0.1 M NaOH, three times with freshwater, and once with 100 kDa filtered seawater. Samples were filtered through 20 μm Nitex to remove large eukaryotes. The filtrate was concentrated to <500 mL using a 100-kDa tangential flow filter, which retained the unicellular eukaryotes, microbes, and virus-like particles. The microbial fraction was collected by passing this concentrated sample through 0.45-μm Sterivex filters (Millipore, Inc.) and the filters were then stored at –80 °C.

While sampling the reef surface (above), water was also collected for nutrient analysis directly above the same reef area, within 20 cm of the reef surface, using diver-deployable polycarbonate Niskin bottles. Water samples were filtered through 0.2-μm Nuclepore Track-Etched membrane filters (Whatman) into 20 mL high-density polyethylene scintillation vials with cone-shaped plastic lined lids (Fisher Scientific) and then stored at –20 °C. Inorganic nutrient (nitrate + nitrite, nitrite, and phosphate) concentrations were measured using a QuikChem 8000 flow injection analyzer (Lachat Instruments) at the Marine Science Institute Analytical Laboratory (University of California, Santa Barbara).

Characterization of the benthic community was completed using photoquadrats (1). Two 25-m transect lines were quantified per site and ten 0.72-m<sup>2</sup> quadrats were assessed along each transect line using digital underwater photographs. Images were analyzed using the program Photogrid 1.0, where 100 stratified random points were identified to determine benthic community composition at each site. All organisms were characterized to the finest level of resolution possible (genus level for corals and macroalgae and functional group for turfing and crustose coralline algae). All surveys took place at 10 m depth on the fore-reef habitat of each atoll.

**DNA Extraction and Metagenomic Library Construction.** DNA was extracted and purified using a column purification protocol (NucleoSpin Tissue; Macherey-Nagel), modified to complete the lysis steps in the Sterivex filters. Lysates were removed from the Sterivex filters using a 3-mL Luer-Loc syringe. The rest of the extraction procedure was performed according to the manufacturer's recommendations. Metagenomic libraries were prepared using a GS FLX Titanium Rapid Library Preparation Kit (Roche Applied Sciences) and pyrosequenced using a 454 GS-FLX platform at San Diego State University.

**Sequence Library Quality Control and Bioinformatics Analyses.** Metagenomic sequence reads were filtered for quality using the Preprocessing and Information of Sequences tool, PRINSEQ (2), uploaded to the MG-RAST server (<http://metagenomics.nmpdr.org/metagenomics.cgi>), and compared with the SEED protein database using BLASTx (3). For taxonomic annotation, sequences with significant similarities ( $E < 10^{-5}$ ) were assigned to the closest identified microbial representative. For functional annotation, sequences were assigned the function of the closest

identified protein and these functions were then grouped into metabolic pathways according to the subsystems in the SEED database (4). These sequences are publically available through the MG-RAST server under the project name Pacific Reef Microbiomes (<http://metagenomics.anl.gov/linkin.cgi?project=9220>).

**Statistics.** Nonmetric multidimensional scaling (nMDS) analyses were used with the annotated metagenome data to visualize between-atoll similarity in terms of two discrete response variables: community structure and community metabolism. Community structure was determined by comparing the relative abundances of 19 higher-rank microbial taxa (to limit the number of taxonomic categories to avoid type I errors associated with loss of statistical power in multiple comparisons; see Table S7 for clarification of taxonomic groups), averaged by atoll. Similarly, community metabolism was determined by comparing the relative abundance of 20 level 1 subsystem categories in the SEED database ([http://theseed.org/wiki/Main\\_Page](http://theseed.org/wiki/Main_Page)). Significant groupings of atolls depicted by the nMDS were quantified using a similarity profile test based on the Bray–Curtis algorithm ( $P < 0.01$ ) (similarity profile analysis or SIMPROF) (5), using the clustsig package (6) for R (R Development Core Team). Analyses were based on 10,000 random permutations of the annotated metagenomic data. These significant groupings designated by SIMPROF were then superimposed upon the nMDS plots. Individual variables that might be responsible for driving group differences in multivariate space were investigated by calculating Spearman's rank correlations and those with strong correlations (in this study,  $\geq 0.6$ ) plotted as vectors in the nMDS plots.

For an initial exploration of potential correlations between the three predictor variables and either microbial community structure or metabolism, a canonical correspondence analysis (CCA) was performed using the R package, vegan (7). The results from this analysis were visualized by plotting the CCA loading vectors. To formally quantify how much variation in the microbial communities or their metabolism could be explained by the predictors measured (continuous variables), a permutational distance-based multivariate linear model (DistLM) (8) was used in PERMANOVA+ ([www.primers-e.com/permanova.htm](http://www.primers-e.com/permanova.htm)). To determine their suitability for use in a linear model, collinearity of the predictor variables was tested by calculating pairwise Pearson correlation coefficients. No two predictors exceeded a correlation of 0.75 (Table S6); therefore, all were included in the model. Model selection (balancing performance with parsimony) was based on Akaike's information criterion (AIC) (9) with a second-order bias correction applied (AICc) (10). Significance was determined by comparing the model results obtained with the original data structure to those obtained with 10,000 random permutations of the raw data. Statistical analyses were performed using R Version 2.15.1 (R Development Core Team, [www.r-project.org](http://www.r-project.org)) (11) unless otherwise stated.

The program Xipe (12) was used to determine lower level taxa and level 3 subsystem metabolic pathways that were significantly different ( $P < 0.05$ ; 1,000 iterations) between metagenomic libraries sampled from all 11 atolls. Its bootstrapping technique allows comparison of thousands of gene categories between two metagenomic libraries with a designated confidence threshold (e.g., 95%). The Xipe findings were further tested for correlation with distance from the equator, nutrient concentration, and percentage cover of the seven benthic functional groups by calculating Pearson correlation coefficients ( $r$ ) in SPSS (IBM Corporation).

- Sandin SA, et al. (2008) Baselines and degradation of coral reefs in the northern Line Islands. *PLoS ONE* 3(2):e1548.
- Schmieder R, Edwards R (2011) Quality control and preprocessing of metagenomic datasets. *Bioinformatics* 27(6):863–864.
- Altschul SF, Gish W, Miller W, Myers EW, Lipman DJ (1990) Basic local alignment search tool. *J Mol Biol* 215(3):403–410.
- Meyer F, et al. (2008) The metagenomics RAST server—a public resource for the automatic phylogenetic and functional analysis of metagenomes. *BMC Bioinformatics* 9:386.
- Clarke KR, Somerfield PJ, Gorley RN (2008) Testing of null hypotheses in exploratory community analyses: Similarity profiles and biota-environment linkage. *J Exp Mar Biol Ecol* 366(1-2):56–69.
- Whitaker D, Christman M (2010) clustsig: Significant cluster analysis. R package Version 1.0. Available at [www.r-project.org](http://www.r-project.org). Accessed June 20, 2014.
- Oksanen JF, et al. (2012) vegan: Community ecology package. R package Version 2.0-4. Available at <http://cran.r-project.org/index.html>. Accessed June 20, 2014.
- McArdle BH, Anderson MJ (2001) Fitting multivariate models to community data: A comment on distance-based redundancy analysis. *Ecology* 82(1):290–297.
- Akaike H (1973) Maximum likelihood identification of gaussian autoregressive moving average models. *Biometrika* 60(2):255–265.
- Hurvich CM, Tsai CL (1989) Regression and time-series model selection in small samples. *Biometrika* 76(2):297–307.
- Gentleman R, Ihaka R (1996) The R language. *Proceedings of 28th Symposium on the Interface of Computing Science and Statistics (Graph-Image-Vision)*, eds Billard L, Fisher NI (Interface Found, Sydney, Australia), pp 326–330.
- Rodriguez-Brito B, Rohwer F, Edwards RA (2006) An application of statistics to comparative metagenomics. *BMC Bioinformatics* 7:162.

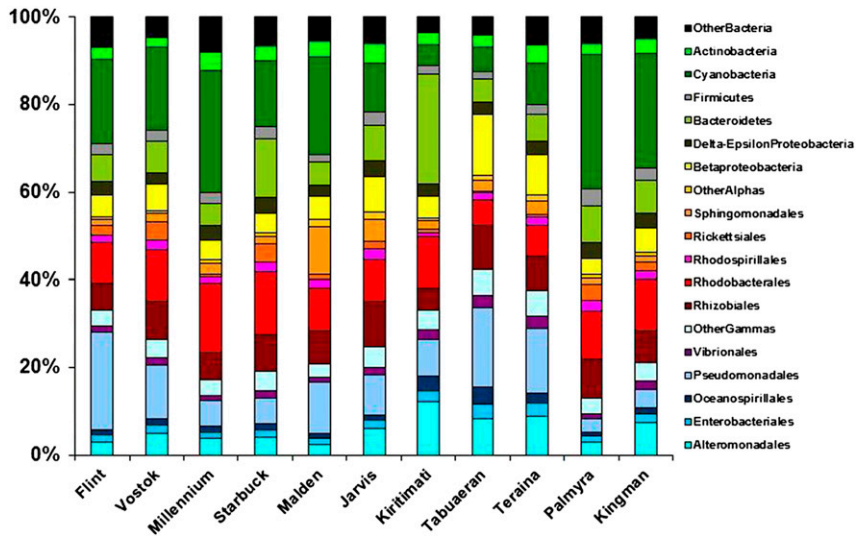

Fig. S1. The relative abundance of bacterial groups across the LI. Reads in the 22 metagenomes were taxonomically annotated by comparison with the SEED database and averaged by atoll. Atolls on the x axis are ordered south to north, left to right.

### Taxonomic similarities

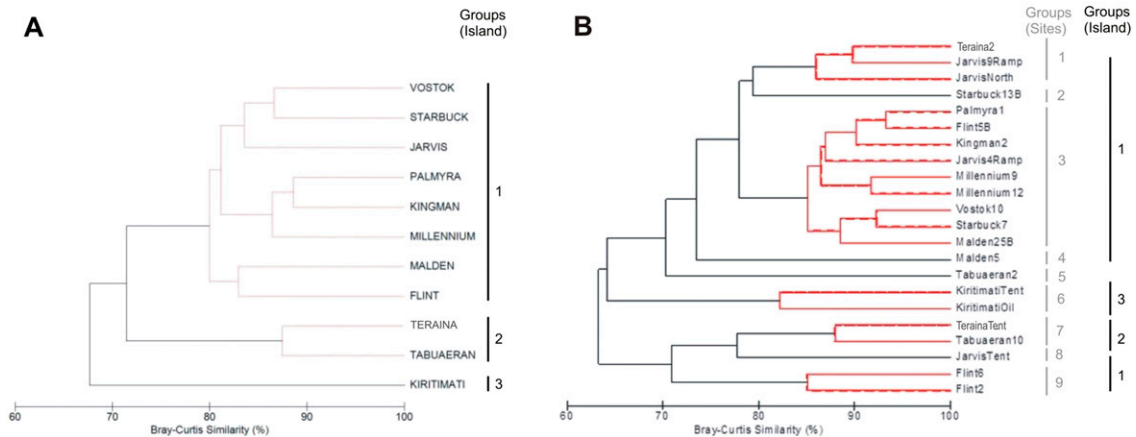

Fig. S2. Multivariate structure for the relative abundance of taxonomic similarities averaged by island (A) and at site level (B) analyzed using SIMPROF ( $P < 0.01$ ).

# Metabolic similarities

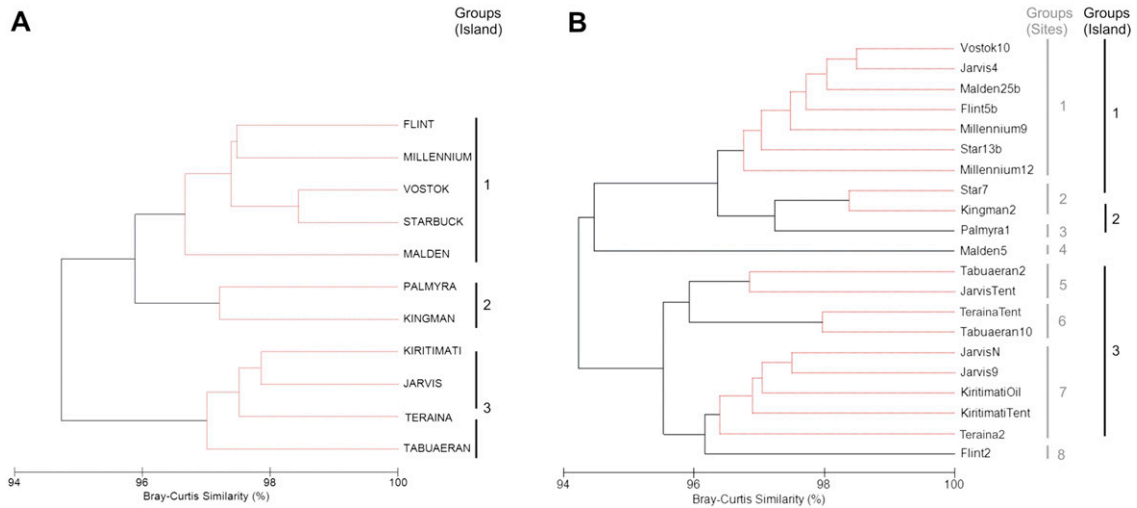

Fig. 53. Multivariate structure for the relative abundance of metabolic groupings averaged by island (A) and at site level (B) analyzed using SIMPROF ( $P < 0.01$ ).

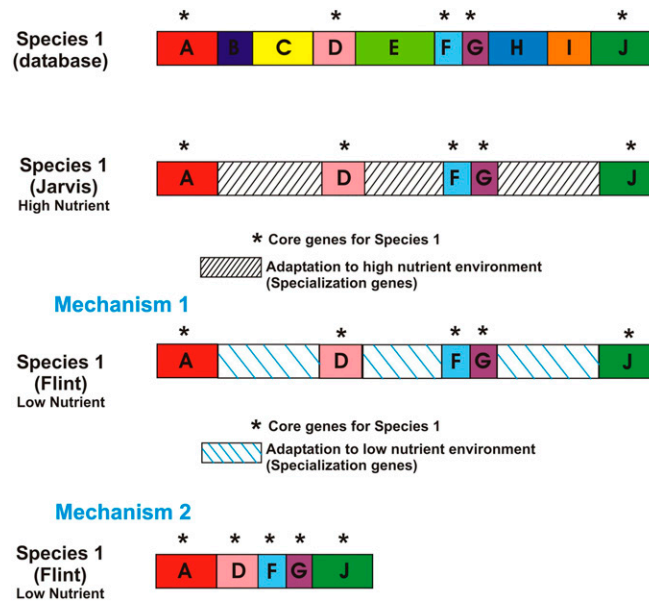

Fig. 54. Conceptual model depicting variation in genome size between strains due to different complements of environment-dependent specialization genes.

**Table S1. Metagenomic libraries**

| Sample name     | Date collected | Total no. of reads | Average read, bp | Latitude, ° | Longitude, ° | % GC content | Total no. of taxon similarities | Total no. of metabolism similarities |
|-----------------|----------------|--------------------|------------------|-------------|--------------|--------------|---------------------------------|--------------------------------------|
| Flint 2         | 03/30/09       | 24,111             | 345.71           | -11.41924   | -151.82739   | 51           | 8,454                           | 10,167                               |
| Flint 5         | 03/29/09       | 98,284             | 399.55           | -11.43911   | -151.81964   | 47           | 28,931                          | 37,301                               |
| Flint 6         | 03/31/09       | 39,070             | 430              | -11.44423   | -151.81709   | 47           | 17,316                          | 20,252                               |
| Jarvis 4        | 04/04/10       | 171,749            | 400.17           | -0.38188    | -159.99800   | 48           | 49,941                          | 61,987                               |
| Jarvis 9        | 04/02/10       | 235,984            | 407.55           | -0.36537    | -160.00600   | 50           | 63,207                          | 77,340                               |
| Jarvis North    | 11/13/10       | 66,808             | 384.81           | -0.36902    | -160.00819   | 52           | 20,340                          | 23,781                               |
| Jarvis Tent     | 11/12/10       | 49,774             | 397.8            | -0.369017   | -160.00819   | 50           | 22,465                          | 24,945                               |
| Kingman 2       | 10/31/10       | 225,914            | 381.44           | 6.387       | -162.38600   | 52           | 47,187                          | 61,909                               |
| Kiritimati Oil  | 11/21/10       | 156,251            | 393.74           | 1.99095     | -157.48251   | 51           | 54,015                          | 62,427                               |
| Kiritimati Tent | 11/20/10       | 30,131             | 387.29           | 2.0085833   | -157.48945   | 50           | 11,457                          | 12,895                               |
| Malden 25       | 04/11/09       | 164,564            | 381.72           | -4.03326    | -154.95094   | 52           | 42,411                          | 51,614                               |
| Malden 5        | 04/10/09       | 48,258             | 349.25           | -3.99531    | -154.94452   | 57           | 10,993                          | 12,902                               |
| Millennium 12   | 04/19/09       | 26,895             | 357.99           | -9.90774    | -150.19974   | 53           | 7,801                           | 9,190                                |
| Millennium 9    | 04/17/09       | 39,933             | 373.89           | -9.91672    | -150.21072   | 54           | 13,032                          | 15,772                               |
| Palmyra 1       | 10/25/10       | 170,135            | 386.57           | 5.86646     | -162.11346   | 37           | 53,623                          | 71,606                               |
| Starbuck 13     | 04/05/09       | 29,347             | 401.56           | -5.66441    | -155.87346   | 46           | 11,874                          | 15,052                               |
| Starbuck 7      | 04/06/09       | 83,014             | 431.87           | -5.62220    | -155.88002   | 42           | 34,058                          | 45,652                               |
| Tabuaeran 10    | 11/04/10       | 104,845            | 396.09           | 3.82595     | -159.34957   | 56           | 39,697                          | 46,930                               |
| Tabuaeran 2     | 11/06/10       | 73,712             | 411.89           | 3.84085     | -159.36047   | 55           | 31,874                          | 36,241                               |
| Teraina 2       | 11/09/10       | 42,317             | 385.46           | 4.70242     | -160.39212   | 53           | 12,035                          | 14,199                               |
| Teraina Tent    | 11/08/10       | 285,841            | 412.73           | 4.6867167   | -160.42023   | 51           | 86,972                          | 101,107                              |
| Vostok 10       | 04/01/09       | 83,219             | 357.47           | -10.05835   | -152.30954   | 44           | 32,232                          | 41,533                               |
| Total           | —              | 2,250,156          | —                | —           | —            | —            | 699,915                         | 854,802                              |

Metadata and library details for the 22 metagenomes generated from the 22 sites sampled at 11 atolls.

**Table S2. Predictor variable categories used for CCA and DistLM**

| Sample name     | Hard coral | Crustose coralline algae | Calcified macroalgae | Soft coral | Macroalgae | Turf  | Other* | NO <sub>3</sub> <sup>-</sup> + NO <sub>2</sub> <sup>-</sup> , μM | PO <sub>4</sub> <sup>3-</sup> , μM | NH <sub>4</sub> <sup>+</sup> | Distance from equator <sup>†</sup> |
|-----------------|------------|--------------------------|----------------------|------------|------------|-------|--------|------------------------------------------------------------------|------------------------------------|------------------------------|------------------------------------|
| Flint 2         | 75.85      | 13.10                    | 2.00                 | 0.00       | 1.15       | 7.65  | 0.25   | 1.09                                                             | 0.291                              | 4.32                         | -11.41924                          |
| Flint 5         | 83.00      | 9.00                     | 0.20                 | 0.00       | 0.95       | 6.60  | 0.25   | 0.82                                                             | 0.161                              | 2.46                         | -11.43911                          |
| Flint 6         | ND         | ND                       | ND                   | ND         | ND         | ND    | ND     | 0.79                                                             | 0.147                              | 2.13                         | -11.44423                          |
| Jarvis 4        | 46.30      | 27.20                    | 0.70                 | 0.00       | 7.90       | 17.70 | 0.30   | 4.65                                                             | 0.384                              | ND                           | -0.38188                           |
| Jarvis 9        | 57.90      | 9.30                     | 0.00                 | 0.00       | 3.40       | 29.20 | 0.20   | 4.54                                                             | 0.427                              | ND                           | -0.36537                           |
| Jarvis North    | 10.70      | 31.90                    | 1.00                 | 0.00       | 4.90       | 50.30 | 1.30   | 4.50                                                             | 0.441                              | ND                           | -0.36902                           |
| Jarvis Tent     | 57.65      | 12.00                    | 0.15                 | 0.35       | 6.90       | 21.65 | 0.95   | 3.28                                                             | 0.392                              | 0.289                        | -0.369017                          |
| Kingman 2       | 14.55      | 51.20                    | 12.70                | 0.40       | 0.95       | 18.25 | 1.95   | 1.44                                                             | 0.247                              | 0.203                        | 6.387                              |
| Kiritimati Oil  | 2.21       | 0.00                     | 6.68                 | 0.00       | 4.00       | 82.47 | 4.63   | 2.26                                                             | 0.241                              | 1.15                         | 1.99095                            |
| Kiritimati Tent | 23.36      | 2.50                     | 7.77                 | 1.64       | 0.14       | 58.86 | 5.73   | 2.33                                                             | 0.291                              | 0.436                        | 2.0085833                          |
| Malden 25       | 73.63      | 5.37                     | 1.84                 | 0.00       | 1.79       | 15.95 | 1.42   | 3.90                                                             | 0.264                              | 1.67                         | -4.03326                           |
| Malden 5        | 86.67      | 4.56                     | 0.00                 | 0.00       | 0.22       | 8.11  | 0.44   | 2.82                                                             | 0.253                              | 1.24                         | -3.99531                           |
| Millennium 12   | 65.30      | 11.00                    | 12.30                | 0.00       | 1.10       | 10.10 | 0.20   | 2.28                                                             | 0.216                              | 0.674                        | -9.90774                           |
| Millennium 9    | 69.30      | 6.20                     | 7.70                 | 0.00       | 0.30       | 15.70 | 0.80   | 2.10                                                             | 0.191                              | 0.803                        | -9.91672                           |
| Palmyra 1       | 45.70      | 16.30                    | 5.60                 | 2.00       | 1.40       | 23.90 | 0.60   | 0.52                                                             | 0.195                              | 0.365                        | 5.86646                            |
| Starbuck 13     | 25.55      | 12.35                    | 57.95                | 0.00       | 0.10       | 0.20  | 3.85   | 2.87                                                             | 0.247                              | 1.93                         | -5.66441                           |
| Starbuck 7      | 21.68      | 49.42                    | 21.84                | 0.00       | 1.21       | 4.47  | 1.21   | 4.83                                                             | 0.254                              | 3.18                         | -5.6222                            |
| Tabuaeran 10    | 22.08      | 30.08                    | 34.62                | 0.00       | 8.69       | 3.92  | 0.46   | 2.78                                                             | 0.299                              | 0.630                        | 3.82595                            |
| Tabuaeran 2     | 39.23      | 20.18                    | 16.32                | 0.00       | 2.41       | 17.86 | 4.00   | 1.60                                                             | 0.185                              | 0.936                        | 3.84085                            |
| Teraina 2       | 20.96      | 21.96                    | 0.00                 | 0.76       | 32.12      | 20.44 | 3.76   | 2.24                                                             | 0.279                              | 0.458                        | 4.70242                            |
| Teraina Tent    | 8.64       | 44.93                    | 6.64                 | 6.36       | 2.36       | 30.79 | 0.29   | 1.92                                                             | 0.278                              | 0.348                        | 4.6867167                          |
| Vostok 10       | 81.40      | 14.40                    | 0.35                 | 0.00       | 0.15       | 3.70  | 0.00   | 1.75                                                             | 0.158                              | 1.91                         | -10.05835                          |
| Average         | 44.4       | 18.7                     | 9.35                 | 0.548      | 3.91       | 21.3  | 1.55   | 2.51                                                             | 0.266                              | 1.32                         | —                                  |

Benthic coverage for each functional group is shown as percent cover. Nutrient concentrations are calculated as micromoles per liter. NH<sub>4</sub><sup>+</sup>, ammonium; NO<sub>3</sub><sup>-</sup>, nitrate + nitrite; PO<sub>4</sub><sup>3-</sup>, phosphate.

\*Other benthic organisms.

<sup>†</sup>Distance from equator as absolute value of the latitude in decimal degrees.

**Table S3. Taxa within the seven functional groups used to classify benthic macroorganisms**

|                                                                                                                                                                                                                                                                                                                                 |
|---------------------------------------------------------------------------------------------------------------------------------------------------------------------------------------------------------------------------------------------------------------------------------------------------------------------------------|
| Hard coral                                                                                                                                                                                                                                                                                                                      |
| <i>Acropora, Astreopora, Cyphastrea, Cycloseris, Echinophyllia, Favia, Favities, Fungia, Gardineroseris, Halomitra, Herpolitha, Hydnothophora, Leptastrea, Leptoseris, Lobophyllia, Montastrea, Montipora, Pavona, Platygyra, Pocillopora, Porites, Psammocora, Sandolitha, Scapophyllia, Sytlophora, Tubastrea, Turbinaria</i> |
| Calcified macroalgae                                                                                                                                                                                                                                                                                                            |
| <i>Galaxaura, Halimeda, Neomeris, Peyssonellia</i>                                                                                                                                                                                                                                                                              |
| Soft coral                                                                                                                                                                                                                                                                                                                      |
| <i>Cladiellqa, Dendronephtya, Lobophytum, Pachyclavularia, Sarcophyton, Sinularia, Stereonephthya</i>                                                                                                                                                                                                                           |
| Fleshy macroalgae                                                                                                                                                                                                                                                                                                               |
| <i>Avrainvillea, Brown crust, Caulerpa, Dictyosphaeria, Dictyota, Hypnea, Lobophora, Valonia</i>                                                                                                                                                                                                                                |
| Other benthic organisms                                                                                                                                                                                                                                                                                                         |
| <i>Cyanobacteria, Heteractis, Holothurian, Hydroid, Millepora, Rhodactis, Sand, Sponge, Stylaster, Tridacna, Tunicate, Zoanthid</i>                                                                                                                                                                                             |

Crustose coralline algae and fleshy turf algae were identified as functional groups only.

**Table S4. Summarized results of a DistLM for associations of microbial community structure (Taxa) and metabolic function (Metabolism)**

| Variable              | AICc   | SS, trace  | Pseudo-F | P      | Prop., %* | res.df |
|-----------------------|--------|------------|----------|--------|-----------|--------|
|                       |        | Taxa       |          |        |           |        |
| Hard coral            | 129.52 | 1,438.1    | 3.4065   | 0.0215 | 15.2      | 19     |
|                       |        | Metabolism |          |        |           |        |
| Distance from equator | 53.323 | 47.953     | 4.2767   | 0.0147 | 18.4      | 19     |

Prop., proportion of variance; res.df, degrees of freedom for the residual; SS, sum of squares. The total number of predictors included equals 10 (the percent cover of benthic functional groups, distance from the equator, and nutrient availability).

\*The best-fit models are shown, along with the proportion of variability in the multivariate response explained by that variable (Prop.).

**Table S5. Significance test for the linear correlations of metabolic pathway abundance with phosphate concentration**

| Metabolic pathway                  | r      | P            |
|------------------------------------|--------|--------------|
| Conjugative transfer               | 0.863  | <b>0.001</b> |
| Bacterial chemotaxis               | 0.598  | 0.052        |
| Nitrate and nitrite ammonification | 0.628  | <b>0.038</b> |
| Cobalt-zinc-cadmium resistance     | 0.637  | <b>0.035</b> |
| Multidrug resistance               | 0.617  | <b>0.043</b> |
| Ton and Tol transport              | 0.650  | <b>0.03</b>  |
| Chlorophyll biosynthesis           | -0.552 | 0.079        |
| Photosystem II                     | -0.534 | 0.091        |
| Ribosome SSU bacterial             | -0.620 | <b>0.042</b> |

P values < 0.05 are shown in bold.

**Table S6. Collinearity among predictor variables using Pearson's coefficient, r**

|                          | Hard coral | Crustose coralline algae | Other calcified algae | Soft coral | Macroalgae | Turf algae | Other benthic | Nitrate       | Phosphate     |
|--------------------------|------------|--------------------------|-----------------------|------------|------------|------------|---------------|---------------|---------------|
| Hard coral               |            |                          |                       |            |            |            |               |               |               |
| Crustose coralline algae | -0.536     |                          |                       |            |            |            |               |               |               |
| Other calcifying algae   | -0.373     | 0.193                    |                       |            |            |            |               |               |               |
| Soft coral               | -0.355     | 0.339                    | -0.089                |            |            |            |               |               |               |
| Macroalgae               | -0.287     | 0.120                    | -0.151                | 0.001      |            |            |               |               |               |
| Turf algae               | -0.533     | -0.196                   | -0.297                | 0.213      | 0.051      |            |               |               |               |
| Other benthic            | -0.548     | 0.196                    | 0.294                 | -0.030     | 0.211      | 0.538      |               |               |               |
| Nitrate                  | -0.161     | 0.163                    | 0.038                 | -0.025     | 0.105      | 0.077      | -0.077        |               |               |
| Phosphate                | -0.266     | 0.155                    | -0.175                | -0.017     | 0.258      | 0.299      | -0.088        | <b>0.708</b>  |               |
| Distance from equator    | 0.487      | -0.072                   | 0.054                 | -0.071     | -0.250     | -0.531     | 0.316         | <b>-0.641</b> | <b>-0.741</b> |

The correlations between distance from equator and nutrient concentrations are shown in bold.
